# Supplementary material for: A Simple Ratiometric Electrochemical Aptasensor Based on the Thionine–Graphene Nanocomposite for Ultrasensitive Detection of Aflatoxin B2 in Peanut and Peanut Oil
Source: MDPI journal article supplement (doi:10.3390/chemosensors10050154), 2022-04-21
Supplement: s1 [file s1]

Supplementary Materials

# A Simple Ratiometric Electrochemical Aptasensor Based on the Thionine–Graphene Nanocomposite for Ultrasensitive Detection of Aflatoxin B2 in Peanut and Peanut Oil

Fan Jia, Yuye Li, Qingfa Gong, Dong Liu \*, Shuyun Meng, Chengxi Zhu and Tianyan You \*

Key Laboratory of Modern Agricultural Equipment and Technology, Ministry of Education, School of Agricultural Engineering, Jiangsu University, Zhenjiang 212013, China; ujsjf@outlok.com (F.J.); 2112016014@stmail.ujs.edu.cn (Y.L.); 2222116055@stmail.ujs.edu.cn (Q.G.); 2112116010@stmail.ujs.edu.cn (S.M.); dxzcx@jsut.edu.cn (C.Z.)

\* Correspondence: dongliu@ujs.edu.cn (D.L.); youty@ujs.edu.cn (T.Y.)

## 1. XRD Spectra of THI-rGO

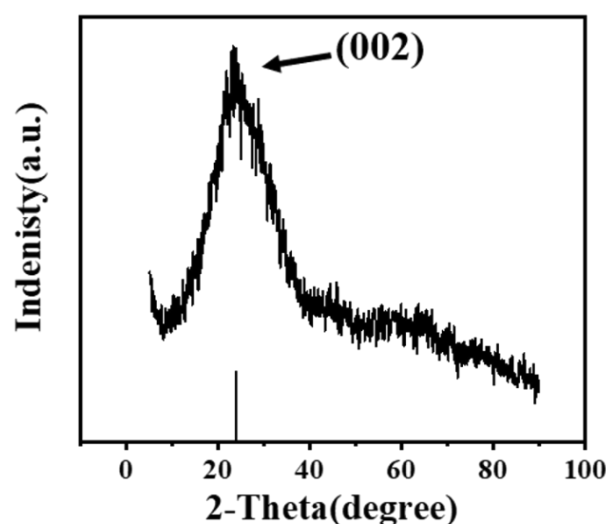

Figure S1. XRD spectra of rGO.

**Citation:** Jia, F.; Li, Y.; Gong, Q.; Liu, D.; Meng, S.; Zhu, C.; You, T. A Simple Ratiometric Electrochemical Aptasensor Based on the Thionine–Graphene Nanocomposite for Ultrasensitive Detection of Aflatoxin B2 in Peanut and Peanut Oil. *Chemosensors* **2022**, *10*, 154. <https://doi.org/10.3390/chemosensors10050154>

Academic Editor: António M. Peres

Received: 24 March 2022

Accepted: 20 April 2022

Published: 21 April 2022

**Publisher's Note:** MDPI stays neutral with regard to jurisdictional claims in published maps and institutional affiliations.

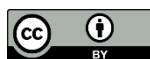

**Copyright:** © 2022 by the authors. Submitted for possible open access publication under the terms and conditions of the Creative Commons Attribution (CC BY) license (<https://creativecommons.org/licenses/by/4.0/>).

## 2. Optimization of Experimental Conditions

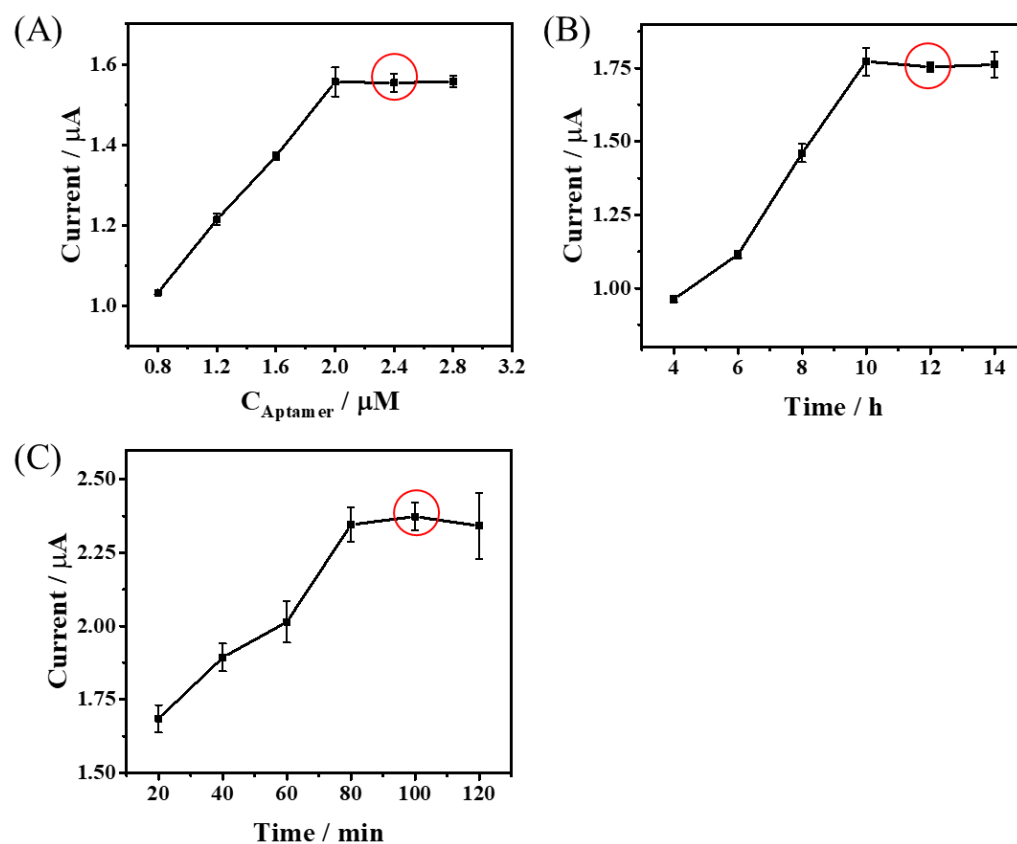

**Figure S2.** Effect of (A) aptamer concentration, (B) the incubation time of aptamer, (C) incubation time of AFB2 on peak current. Error bars represent the relative standard deviation (RSD, n = 3).

## 3. Reproducibility and Stability of the EC Aptasensor

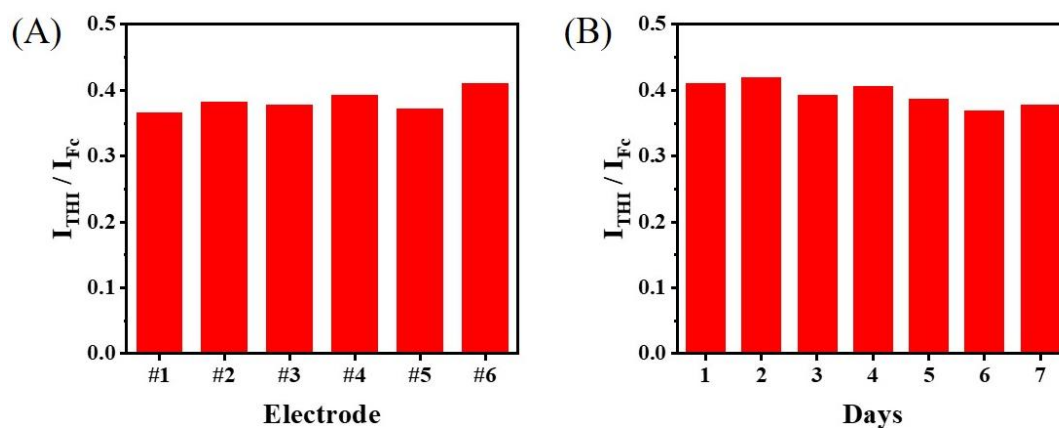

**Figure S3.** (A) The reproducibility for AFB2 detection by 6 parallel measurements. (B) The sensing results of the proposed aptasensor for AFB2 detection after stored for 1–7 days.
